# Supplementary material
Source: PubMed Central journal article supplement (PMC4457714)
Supplement: NIHMS664577-supplement-Supp_FigureS1-S2.pdf [file NIHMS664577-supplement-Supp_FigureS1-S2.pdf]

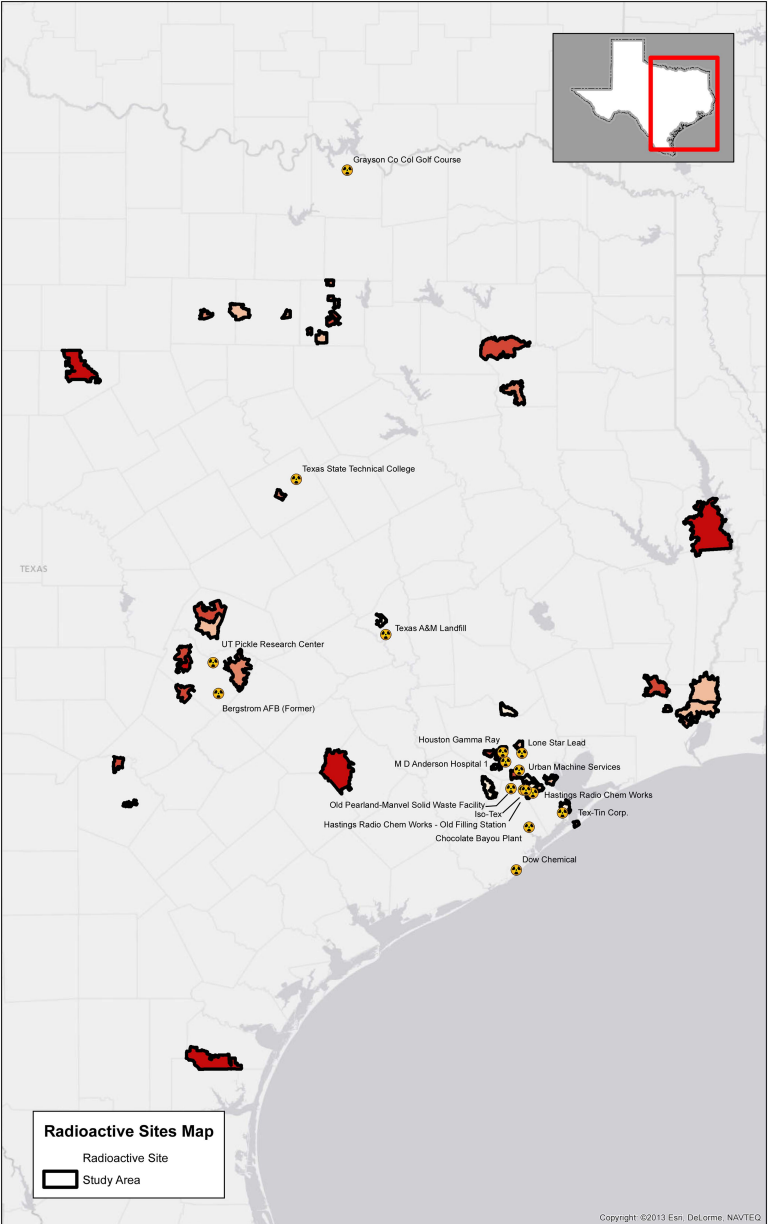

Supplementary Figure 1. Geographic map of radiation pollution sources in Texas.

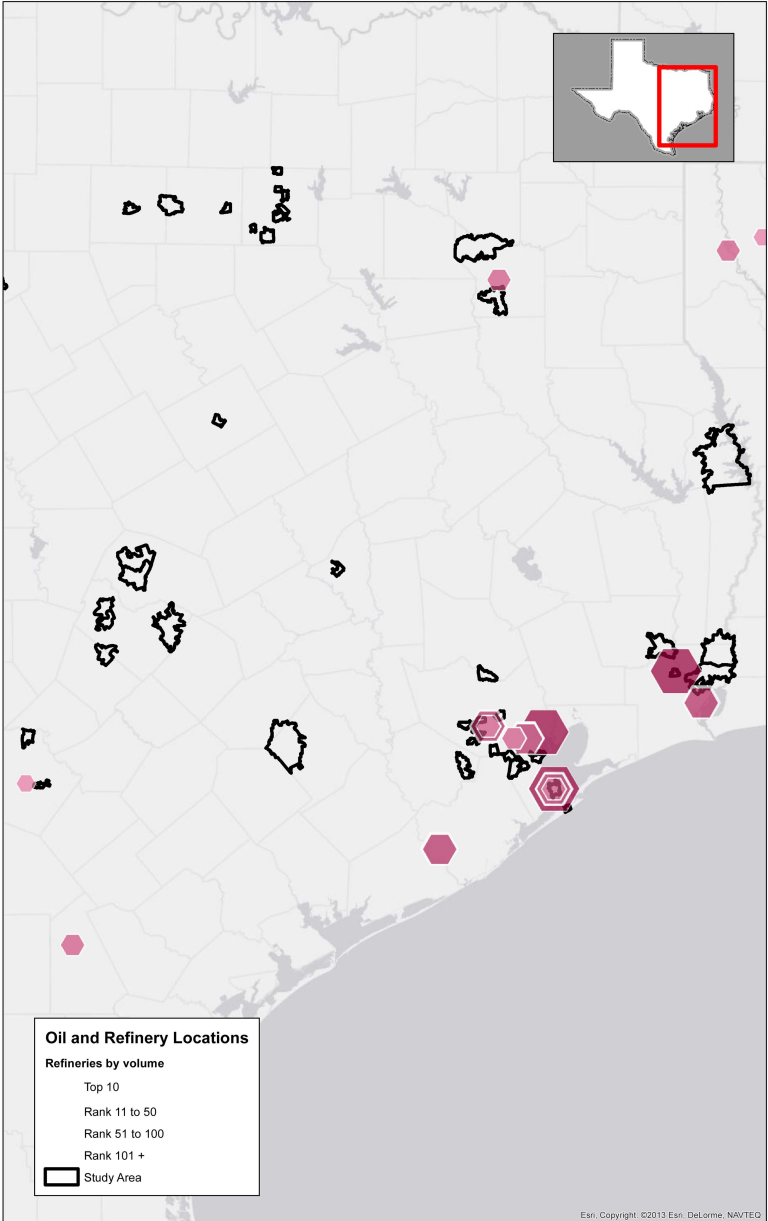

Supplementary Figure 2. Geographic map of oil refinery locations in Texas.
